# Supplementary material for: Arthroscopic device with bendable tip for the controlled extrusion of hydrogels on cartilage defects
Source: Springer Nature journal article supplement (doi:10.1038/s41598-024-70426-2), 2024-08-27
Supplement: MOESM1 [file 41598_2024_70426_MOESM1_ESM.docx]

**Supplementary Material**

**Arthroscopic device with bendable tip for the controlled extrusion of hydrogels on cartilage defects**

Daniele Guarnera1,2, Francesco Restaino1,2, Lorenzo Vannozzi1,2, Diego Trucco1,2,3, Tommaso Mazzocchi4, Michał Worwąg5, Tomasz Gapinski6, Gina Lisignoli3, Stefano Zaffagnini7, Alessandro Russo7, Leonardo Ricotti1,2,*

1. The BioRobotics Institute, Scuola Superiore Sant’Anna, Piazza Martiri della Liberta’ 33, Pisa, 56127 Italy
2. Department of Excellence in Robotics & AI, Scuola Superiore Sant’Anna, Piazza Martiri della Liberta’ 33, Pisa, 56127 Italy
3. IRCCS Istituto Ortopedico Rizzoli, SC Laboratorio di Immunoreumatologia e Rigenerazione Tissutale, Via di Barbiano, 1/10, Bologna 40136, Italy
4. Relief s.r.l, Viale Rinaldo Piaggio 32, Pontedera, 56025, Italy
5. Vimex Endoscopy, Ul. Toruńska 27, Gliwice 44-122, Poland
6. Lega Medical Sp. Z o. O, ul. Majowa 11, Rybnik 44-217, Poland
7. IRCCS Istituto Ortopedico Rizzoli, Orthopaedic and Traumatologic Clinic, Via di Barbiano, 1/10, Bologna 40136, Italy

* Address correspondence to Daniele Guarnera at the Biorobotics Institute, Scuola Superiore Sant’Anna, Piazza Martiri della Libertà 33, Pisa, 56127 Italy. Electronic mail: daniele.guarnera@santannapisa.it


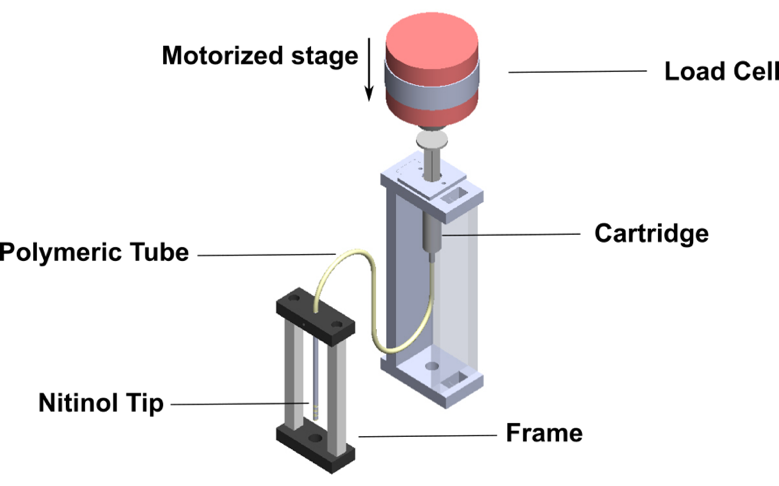


**Figure S1**. Experimental setup used for evaluating the extrusion force needed to flow the different hydrogels through tubes having different diameters.


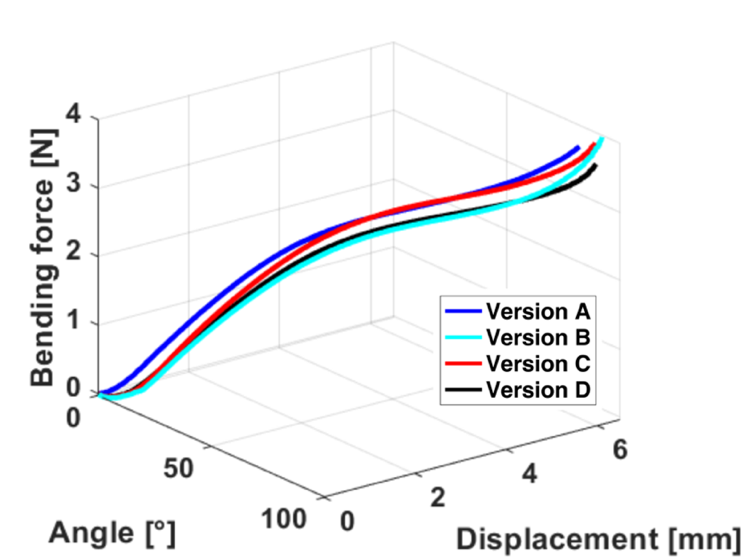


**Figure S2**. Mechanical characterization of the tip. Correlation between displacement, bending force and bending angle, for all the tip versions.


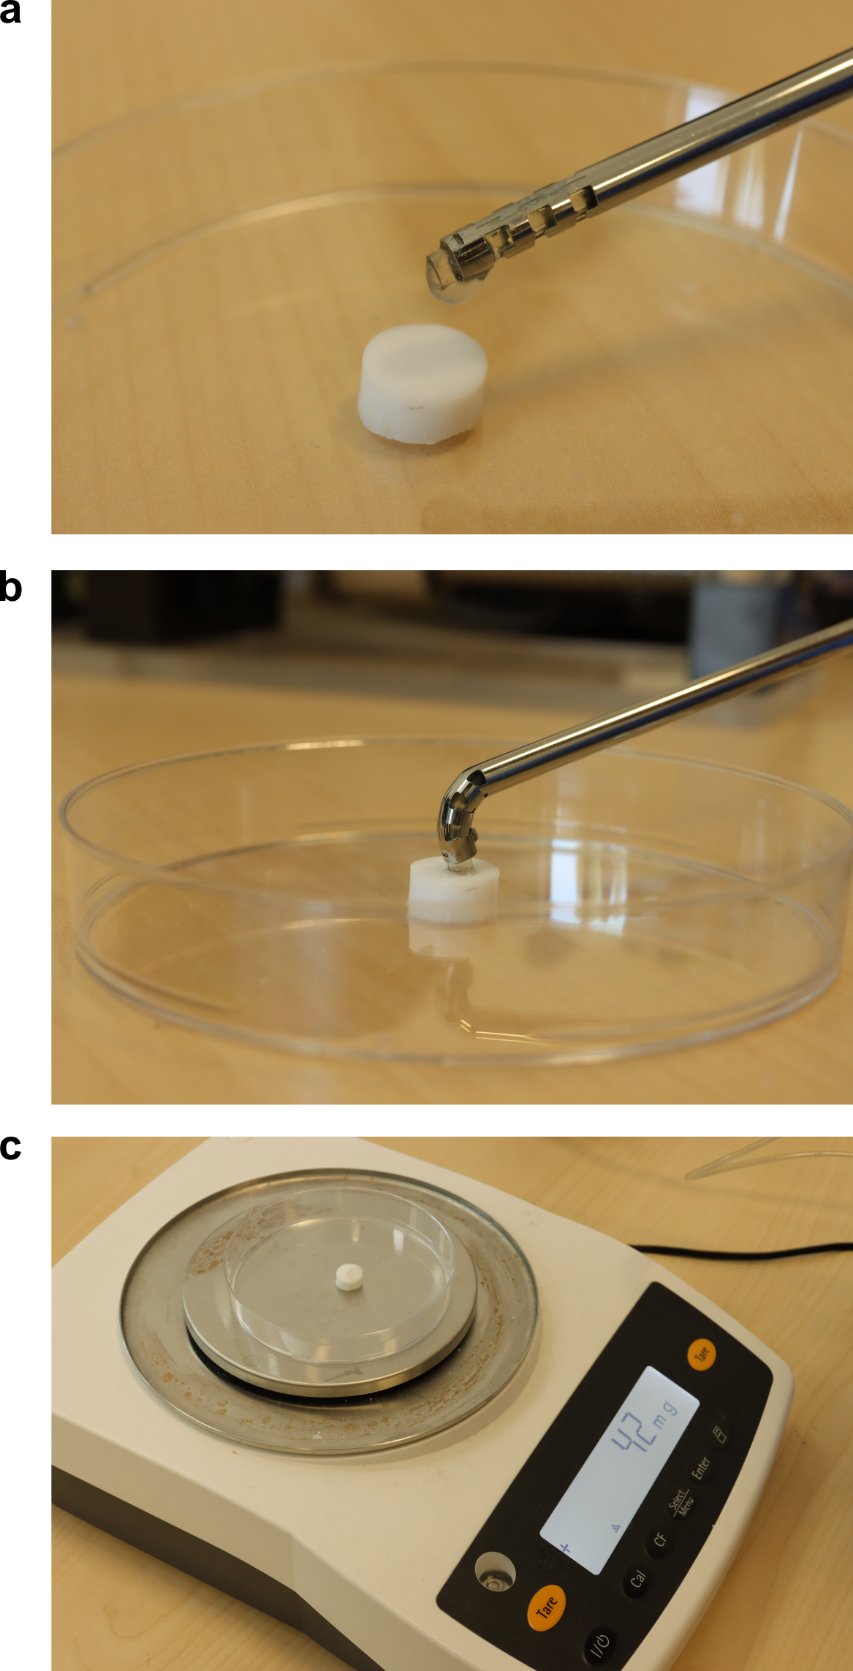


**Figure S3**. Examples of conditions set for the resolution tests. (a) Extrusion of GGMA with straight tip in fall condition; (b) extrusion of GMMA with bent tip in contact condition. All tests were performed by printing materials on a cylindrical teflon substrate. (c) Precision balance used to weigh the quantity of hydrogel extruded (the weight of the bare teflon was considered, through an appropriate tare).


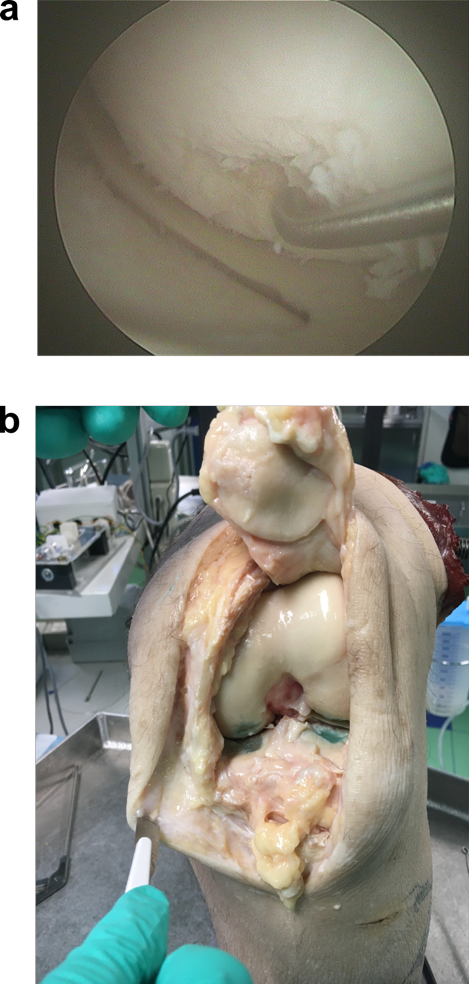


**Figure S4.** Ex-vivo test on a human cadaver knee. (a) Creation of the defect on the medial condyle using a 90°-bent rasp. (b) Exposed knee tissues, allowing a check of the hydrogel retention on the cartilage defects after extrusion (the hydrogel is blue-colored).

| **Volumetric System - Free Comments** | **Pneumatic System - Free Comments** |
| --- | --- |
| The bendable tip should better return to its original position; the control of the quantity of extruded material needs to be improved. | The tip diameter could be smaller to reach out the corners and to have more maneuverability. However, it is quite easy to use. |
| Apart from injectability, the device works very well. | Good relation between pedal and extrusion; good maneuverability; the tip is probably too large. |
| The device is good, but the quantity of material released is not so accurate. | I would reduce the tip size. In arthroscopy moving large tips is hard, and they are difficult to be clearly seen. |
| The device keeps on releasing even after leaving the pedal; the tip sometimes remains bent after use. | The tip should be smaller; it would be nice to have a unidirectional bending. |
| The tip is probably too big; it can be used inside the knee, but considering the ankle, a smaller tip would be more appropriate. |  |
| The bendable tip is not so crucial for the knee: maybe it would be more useful in other joints; the pedal-controlled extrusion is not effective: a more ‘controlled’ pedal would be more useful; the mechanism for the tip rotation is useful, but it should be easier to use. |  |
| The tool is too long and hard to drive; the tip offers not so many advantages with respect to a straight one; it should be smaller; the pedal is hard to press. |  |

**Table S1**. Free comments provided by the surgeons after testing both systems on a cadaver knee.

Complete list of Supplementary Movies:

1. Video S1
2. Video S2
3. Video S3
4. Video S4
5. Video S5

The Supplementary Movies are available at <https://doi.org/10.5281/zenodo.8147102>
